1 **Differences in coagulation responses to vascular injury between uninterrupted**

2 **dabigatran and apixaban - a clinical prospective randomized study**

3

4 Yasuhiro Ikami, M.D.,<sup>a</sup> Daisuke Izumi, M.D.,<sup>a</sup> Shinya Fujiki, M.D.,<sup>a</sup> Hirotaka Sugiura,

5 M.D.,<sup>b</sup> Sou Otsuki, M.D.,<sup>a</sup> Naomasa Suzuki, M.D.,<sup>a</sup> Yuta Sakaguchi, M.D.,<sup>a</sup> Takahiro

6 Hakamata, M.D.,<sup>a</sup> Yuki Hasegawa, M.D.,<sup>a</sup> Nobue Yagihara, M.D.,<sup>a</sup> Kenichi Iijima, M.D.,<sup>a</sup>

7 Takahiro Tanaka, Ph.D.,<sup>c</sup> Masahiro Ishizawa, M.D.,<sup>c</sup> Masaomi Chinushi, M.D.,<sup>d</sup> Tohru

8 Minamino, M.D.,<sup>a,e</sup> and Takayuki Inomata, M.D.<sup>a</sup>

9

10 <sup>a</sup>Department of Cardiovascular Medicine, Niigata University Graduate School of Medical  
11 and Dental Sciences, Niigata, 951-8510, Japan

12 <sup>b</sup>Department of Cardiovascular Medicine, Niigata Medical Center, Niigata, 950-2022, Japan

13 <sup>c</sup>Clinical and Translational Research Center, Niigata University Medical and Dental Hospital,  
14 Niigata, 951-8520, Japan

15 <sup>d</sup>School of Health Science, Faculty of Medicine, Niigata University, Niigata, 951-8518,  
16 Japan

17 <sup>e</sup>Department of Cardiovascular Biology and Medicine, Juntendo University Graduate School  
18 of Medicine, Tokyo, 113-8421, Japan

19

**NOTE: This preprint reports new research that has not been certified by peer review and should not be used to guide clinical practice.**

20 **Short title:** Differences in coagulation responses among DOACs

21 **Total word count:** 4927 words

22

23 **Address correspondence to:**

24 Daisuke Izumi M.D., Ph.D.

25 E-mail: [dizumi@med.niigata-u.ac.jp](mailto:dizumi@med.niigata-u.ac.jp)

26 Department of Cardiovascular Medicine, Niigata University Graduate School of Medical and

27 Dental Sciences

28 1-757 Asahimachidori, Chuo-ku, Niigata 951-8510, Japan

29 Phone: +81-25-227-2185, Fax: +81-25-227-0774

30 **Abstract**

31

32 **Background:** The coagulation response during vascular injury with uninterrupted  
33 administration of direct oral anticoagulants (DOACs) has not been elucidated. Our aim was to  
34 evaluate differences in coagulation responses after vascular injury between uninterrupted  
35 direct thrombin inhibitor and direct factor Xa inhibitor recipients.

36

37 **Methods:** Patients scheduled for catheter ablation for atrial fibrillation were randomly  
38 assigned to receive dabigatran or apixaban in this prospective, randomized, comparative,  
39 parallel-group study. Venous blood was collected three times: 180 minutes after taking the  
40 anticoagulant on the day before the procedure, before vascular punctures of the ablation  
41 procedure, and 10–15 minutes after the start of vascular punctures.

42

43 **Results:** Forty-two patients were enrolled. The prothrombin fragment 1+2 (F1+2) level, the  
44 primary endpoint, was much larger after vascular puncture in the uninterrupted dabigatran  
45 recipients (median: 83 pmol/L; interquartile range: 56–133 pmol/L) than in the uninterrupted  
46 apixaban recipients (median: 1 pmol/L; interquartile range: –3–19 pmol/L;  $P < 0.001$ ).  
47 Antithrombin levels decreased after vascular puncture in dabigatran recipients, and both  
48 protein C and antithrombin levels decreased after vascular puncture in apixaban recipients.

49

50 **Conclusions:** Unlike uninterrupted apixaban, uninterrupted dabigatran does not inhibit

51 thrombin generation in response to vascular injury.

52

53 **Non-standard Abbreviations and Acronyms**

54 AF Atrial fibrillation

55 DOAC Direct oral anticoagulant

56 F1+2 Prothrombin fragment 1+2

57 IQR Interquartile range

58 SFMC Soluble fibrin monomer complex

59

60 **Clinical perspective**

61 **What is new?**

62 ● To the best of our knowledge, this is the first randomized clinical comparison of the  
63 effects of direct thrombin and factor Xa inhibitors on the physiological coagulation and  
64 anticoagulation system after vascular injury while direct oral anticoagulants (DOACs)  
65 serum levels were at the peak phase.

66 ● Unlike uninterrupted apixaban, uninterrupted dabigatran does not inhibit thrombin  
67 generation in response to vascular injury.

68 ● This study shows that physiological anticoagulation factors are consumed during  
69 vascular injury in patients receiving DOACs.

70

71 **What are the clinical implications?**

72 ● The difference in the thrombin generation response during vascular injury between  
73 uninterrupted dabigatran and apixaban may be one of the reasons for different clinical  
74 outcomes of thrombotic and hemorrhagic complications.

75 ● DOACs may inhibit an excessive coagulation response by retaining physiological  
76 anticoagulation factors.

77

78 **Introduction**

79           Atrial fibrillation (AF) has major clinical implications for patients' quality of life,  
80 morbidity with ischemic stroke and heart failure, and mortality (**1–6**). Anticoagulation  
81 therapy is recommended for patients with risk factors for thromboembolism or during the  
82 perioperative period of catheter ablation for AF (**7,8**). Direct oral anticoagulants (DOACs),  
83 which carry a lower risk of bleeding and interact less with diet than other anticoagulants, are  
84 commonly used for anticoagulation therapy (**9–11**). Uninterrupted administration of DOACs  
85 is becoming more common during the perioperative period of catheter ablation for AF  
86 because recent randomized clinical studies of such treatment showed that the risk of major  
87 bleeding was lower than or similar to that with uninterrupted warfarin treatment (**12–15**). In  
88 addition, in these randomized controlled trials, in which DOACs and warfarin were  
89 administered during the perioperative period of AF ablation, the frequency of hemorrhagic  
90 complications among patients who received dabigatran was conspicuously low (**13**). However,  
91 the reason for the low risk of major bleeding complications when catheter ablation is  
92 performed during the peak phase of dabigatran is unclear (**13**). Therefore, this multicenter,  
93 randomized study evaluated differences in coagulation responses, including thrombin  
94 production after vascular injury, between direct thrombin inhibitor and direct factor Xa  
95 inhibitor recipients.

96

97 **Methods**

98 **Study Design**

99           This prospective, open-label, randomized, comparative, parallel-group study was  
100 conducted at two centers, Niigata University Medical and Dental Hospital and Niigata  
101 Medical Center, from August 2019 to March 2021. It was performed in accordance with the  
102 guiding principles of the Declaration of Helsinki and in compliance with the Clinical Trial  
103 Act, a Japanese law designed to ensure that researchers monitor and adhere to the study  
104 criteria. The Niigata University Clinical Research Central Review Board approved the study  
105 protocol (number SP18014), which was included in the Japan Registry for Clinical Trials (ID  
106 jRCT1031190030). Informed consent was obtained from all patients in accordance with these  
107 regulations. The institutional review board comprehensively conducted an ethical review of  
108 all participating facilities.

109  
110 **Participants**

111           Eligible patients were 40–80 years of age, scheduled for catheter ablation for  
112 paroxysmal or persistent AF according to the JCS/JHRS 2019 Guideline on  
113 Non-Pharmacotherapy of Cardiac Arrhythmias (7), were eligible for treatment with  
114 dabigatran (a direct thrombin inhibitor) or apixaban (a direct factor Xa inhibitor) according to  
115 the prescribing guidelines in Japan (9), and provided informed consent to participate. The

116 main exclusion criteria were (1) a history of intracranial hemorrhage or bleeding in other  
117 important organs; (2) the presence of mechanical heart valves or hemodynamically significant  
118 mitral valve stenosis; (3) moderately severe or worse hepatic dysfunction (Child-Pugh class B  
119 or C); (4) renal dysfunction characterized by a Cockcroft–Gault estimated creatinine clearance  
120 <50 mL/min; (5) conditions with a high risk of bleeding (e.g., uncontrolled severe  
121 hypertension, active malignant tumors, congenital or acquired bleeding disorders, active  
122 ulcerative gastrointestinal disorders, treatment with two or more antiplatelet agents); and (6) a  
123 New York Heart Association class III or worse heart failure, left ventricular ejection fraction  
124 of 35% or less according to echocardiography, or a history of hospitalization for heart failure  
125 within 1 year before the study.

126

## 127 **Interventions**

### 128 *Patient assignment*

129 Participants were randomly assigned in a 1:1 ratio to receive dabigatran or apixaban,  
130 and the random allocation sequence was computer generated by a research physician.  
131 Dynamic allocation with a minimization method was used to assign patients. The adjusting  
132 factors were age, gender, and CHADS<sub>2</sub> score (calculated as 1 point each for a history of  
133 hypertension, diabetes, recent heart failure, and age  $\geq 75$  years and 2 points for a history of a  
134 stroke or transient ischemic attack) (16). A comprehensive medical history review, physical



135 examination, blood tests, and transthoracic echocardiography were performed after obtaining  
136 consent from the participants.

137

138 *The dose of the designated anticoagulants*

139 If an anticoagulant drug different from the designated drug had been used before the  
140 study, it was discontinued before drug assignment. After the drug assignment, we  
141 administered the designated DOACs, and administration continued until after catheter  
142 ablation for AF. Dabigatran was administered at a dose of 150 mg twice daily or, if dosage  
143 adjustment was required (e.g., for patients aged  $\geq 75$  years, those taking P-glycoprotein  
144 inhibitors, or those with a history of gastrointestinal bleeding), 110 mg twice daily. Apixaban  
145 was administered at a dose of 5 mg twice daily or, if dose adjustment was required ( $\geq 2$  of the  
146 following criteria: age of  $\geq 80$  years, body weight  $\leq 60$  kg, or serum creatinine  $\geq 1.5$  mg/dL),  
147 2.5 mg twice daily. The designated DOACs were administered at least 1 week before catheter  
148 ablation for AF.

149

150 *Examinations during hospitalization, including blood sampling before and after vascular*  
151 *puncture*

152 Participants were admitted to the hospital two days before the ablation procedure.  
153 Baseline measurements, physical examinations, blood tests, electrocardiography, and

154 transthoracic echocardiography were performed at admission. Venous blood was collected  
155 three times to investigate the effect of vascular injury on the coagulation system: on the day  
156 before the procedure, 180 minutes after the DOAC was administered (i.e., when serum levels  
157 of the DOAC are at the peak phase) (17); before vascular puncture for the ablation procedure;  
158 and 10–15 minutes after the start of vascular puncture, which was performed via a venous  
159 sheath introducer after all sheath introducers were inserted and before intravenous  
160 administration of unfractionated heparin. We planned not to use data from patients who  
161 required more than 15 minutes to insert the sheath introducers. The final DOAC dose was  
162 administered 1-2 hours before the ablation procedure (Figure 1).

163         The vascular puncture was performed according to the modified Seldinger method.  
164 Conventional anatomical landmarks, palpation, and real-time two-dimensional vascular  
165 echocardiography were used to locate the internal jugular veins, femoral arteries, and femoral  
166 veins (18,19). In all patients undergoing AF ablation, four or five vascular sheath introducers  
167 were inserted: one or two 8 Fr (SL0; St. Jude Medical Japan Co. Ltd., Tokyo, Japan) and one  
168 8.5 Fr (SR0; St. Jude Medical Japan Co. Ltd.) into the femoral vein; one 7.2 Fr (Medikit  
169 Supersheath; Medikit Co. Ltd., Tokyo, Japan) into the internal jugular vein; and one 3 Fr  
170 (XEMEX, Zeon Medical, Tokyo, Japan) into the femoral artery.

171         We evaluated the prothrombin fragment 1+2 (F1+2) levels as a marker of thrombin  
172 generation, soluble fibrin monomer complex (SFMC) as a marker of coagulation activation,

173 and D-dimer as a marker of coagulation. Similarly, we evaluated protein C, protein S, and  
174 antithrombin levels as physiological coagulation inhibitors. Sample measurements were made  
175 at an external institution unrelated to this study. We used an ELISA (Enzygnost F1+2  
176 [Monoclonal]; Siemens Healthcare Diagnostic Corporation, Tokyo, Japan) to determine the  
177 F1+2 level, a hemagglutination assay (FM test; Fujirebio Inc., Tokyo, Japan) or latex  
178 photometric immunoassay (Iatro SF II; LSI Medience Co., Tokyo, Japan) to quantify SFMC  
179 level, and functional assays (HemosIL ProClot and HemosIL PS-clot, respectively, I.L. Japan  
180 Co., Ltd., Tokyo, Japan) to quantify protein C and S levels. We used the chromogenic  
181 substrate method (Testzym S ATIII, Sekisui Medical Co., Ltd., Tokyo, Japan) to measure  
182 antithrombin activity and a latex agglutination assay to measure D-dimer levels (LATECLE  
183 D-dimer, KAINOS Laboratories, Inc., Tokyo, Japan).

184

## 185 **Endpoints**

186 The primary endpoint of this study was the change in F1+2 levels before and after  
187 vascular puncture for both DOACs. Secondary endpoints were F1+2, protein C, protein S,  
188 and antithrombin levels and the changes in the latter three levels between vascular punctures  
189 for both DOACs. The exploratory endpoints were all D-dimer levels and the changes in  
190 D-dimer and SFMC levels between vascular punctures for both DOACs. All adverse events  
191 during this study were recorded, analyzed, and classified as serious or nonserious. The events

192 were reported to the Data and Safety Monitoring Committee and evaluated for

193 recommendations to continue the study.

194

## 195 **Statistical Analysis**

196           Based on previous findings (20), we hypothesized that the increase in F1+2 levels  
197 before and after vascular puncture would be approximately 2.5 times higher for dabigatran  
198 than for apixaban. Because we used 80% power and 0.05 bilateral alpha levels, the study had  
199 to include at least 36 patients to reach statistical significance. Given the potential number of  
200 dropouts, we set the target number of participants at 40.

201           The safety analysis set included all enrolled patients. The full analysis set included  
202 all enrolled patients except those with critical protocol violations (e.g., no consent or major  
203 procedural violations). The per protocol set included all enrolled patients from the full  
204 analysis set without major protocol deviations.

205           The study endpoints were analyzed for the full analysis set. Continuous variables  
206 were calculated as means and standard deviations for normally distributed data and as  
207 medians and interquartile ranges (IQRs) for nonnormally distributed data. Categorical  
208 variables were calculated as numbers (percentages). Patient characteristics were compared  
209 with chi-square tests (for five or more events) and Fisher's exact test (for fewer than five  
210 events) for categorical variables, *t*-tests for normally distributed continuous variables, and the

211 Wilcoxon rank-sum test for continuous variables with a skewed distribution. All *P*-values  
212 were two-sided, and values  $<0.05$  were statistically significant. We used SPSS Statistics 27  
213 (IBM Corporation, Armonk, NY, USA) to perform all statistical analyses.

214

## 215 **Results**

### 216 **Patient Characteristics**

217         Of the 42 patients randomly assigned to receive dabigatran or apixaban, 1 patient  
218 assigned to receive dabigatran withdrew from the study before drug administration. The trial  
219 was terminated because the target number of enrolled patients was reached. Persistent AF was  
220 found in nine patients (45%) who received dabigatran and seven patients (33%) who received  
221 apixaban. Thirty-seven patients (17 receiving dabigatran and 20 receiving apixaban)  
222 completed the study. However, one patient receiving dabigatran was excluded from the per  
223 protocol set because of a protocol violation (a mistake in the blood sampling procedure).  
224 There were no changes to trial outcomes after the trial commenced. The demographic and  
225 clinical characteristics of the participants of both groups were similar (Table 1).

226

### 227 **Vascular Punctures**

228 We found no significant difference between the two groups from the final DOAC  
229 administration to the blood samplings (Table 2). In addition, the number of sheath introducers  
230 inserted did not differ significantly between the two groups (Table 2).

231

### 232 **Attrition and Adverse Events**

233 During the study period, five patients (four receiving dabigatran and one receiving  
234 apixaban) dropped out (Figure 2). Of those receiving dabigatran, 1 voluntarily withdrew  
235 consent, 1 patient dropped out because of upper gastrointestinal symptoms, and 2 suffered  
236 unexpected adverse events during ablation procedure (sedative-induced coronary spasm in 1,  
237 delay of 15 minutes or more in vascular puncture in the other). Of those receiving apixaban, 1  
238 patient withdrew because the catheter ablation procedure was canceled. Of those receiving  
239 dabigatran, 2 suffered adverse events that may have been caused by the study (upper  
240 gastrointestinal tract symptoms in 1 and gastric ulcer associated with discontinuation of  
241 proton pump inhibitor therapy in 1). Thus, the per protocol set included 36 patients.

242

### 243 **Primary Endpoint**

244 The change in F1+2 levels after vascular punctures was much larger in participants  
245 taking dabigatran (median: 83 pmol/L [IQR: 56 to 133 pmol/L]) than in those taking  
246 apixaban (median: 1 pmol/L [IQR: -3 to 19 pmol/L] pmol/L);  $P < 0.001$ ; Figure 3).

247

## 248 **Secondary Endpoints**

249 F1+2 levels before vascular puncture were slightly higher in the dabigatran  
250 recipients (median: 113 pmol/L [IQR: 93 – 141 pmol/L]) than in the apixaban recipients  
251 (median: 84 pmol/L [IQR: 72 – 96 pmol/L];  $P < 0.001$ ). Unlike the apixaban recipients,  
252 dabigatran recipients showed a significant increase in F1+2 levels after vascular puncture  
253 (Figure 3). Antithrombin levels were significantly higher in the apixaban recipients before  
254 and after vascular puncture. Moreover, protein C and S levels were significantly higher in the  
255 dabigatran recipients before and after puncture (Figure 4). In both groups, F1+2 levels before  
256 vascular puncture were slightly lower than 3 hours after the administration of DOACs on the  
257 day before the procedure, when serum DOAC levels are in peak phase; in dabigatran  
258 recipients, median levels were 113 pmol/L (IQR: 93 to 141 pmol/L) vs. 136 pmol/L (IQR:  
259 112 to 151 pmol/L), respectively ( $P = 0.039$ ); in apixaban recipients, median levels were 84  
260 pmol/L (IQR: 72 to 96 pmol/L) vs. 109 pmol/L (IQR: 88 – 128 pmol/L), respectively ( $P <$   
261  $0.001$ ) (Figure 3). In the dabigatran recipients, antithrombin levels decreased after vascular  
262 puncture, whereas in apixaban recipients, protein C and antithrombin levels decreased after  
263 vascular puncture (Figure 4).

264

## 265 **Exploratory Endpoints**

266 We found no significant difference in pre-puncture D-dimer levels between the  
267 dabigatran (median: 0.17  $\mu\text{g/mL}$  [IQR: 0.05 to 0.23  $\mu\text{g/mL}$ ]) and apixaban recipients  
268 (median: 0.21  $\mu\text{g/mL}$  [IQR: 0.14 to 0.30  $\mu\text{g/mL}$ ];  $P = 0.067$ ) or in post-puncture D-dimer  
269 levels between the dabigatran (median: 0.12  $\mu\text{g/mL}$  [IQR: 0.05 to 0.23  $\mu\text{g/mL}$ ]) and the  
270 apixaban recipients (median: 0.15  $\mu\text{g/mL}$  [IQR: 0.05 to 0.25  $\mu\text{g/mL}$ ];  $P = 0.42$ ). We also  
271 found no significant difference in the change in D-dimer levels between the dabigatran  
272 (median:  $-0.01$   $\mu\text{g/mL}$  [IQR:  $-0.08$  to  $0$   $\mu\text{g/mL}$ ]) and the apixaban recipients (median:  
273  $-0.04$   $\mu\text{g/mL}$  [IQR:  $-0.08$  to  $0.02$   $\mu\text{g/mL}$ ];  $P = 0.92$ ; Figure 4). Meanwhile, the SFMC  
274 changed positively ( $P = 0.58$ ) after vascular puncture in two dabigatran recipients and one  
275 apixaban recipient. SFMC was measured with two different methods, but the difference in the  
276 method did not affect the change in SFMC ( $P > 0.999$ ).

277

## 278 **Discussion**

279 Our major findings were that (1) after vascular puncture, F1+2 levels increased more  
280 in the uninterrupted dabigatran recipients than in the uninterrupted apixaban recipients, and  
281 (2) Some coagulation inhibitors, such as antithrombin and protein C, appeared to be  
282 consumed after vessel puncture.

283 To our knowledge, this is the first randomized clinical comparison of the effects of  
284 direct thrombin and factor Xa inhibitors on the physiological coagulation and anticoagulation



285 system after vascular injury while serum levels of DOAC were at the peak phase. Several  
286 previous studies of the anticoagulant effect of DOACs have shown that thrombin generation  
287 or levels of coagulation activation markers, such as F1+2 and soluble fibrin, are suppressed to  
288 some extent not only during the peak phase but also during the trough phase of DOACs (20–  
289 23). The degree of suppression of F1+2 levels at the peak levels of DOAC in our study was  
290 similar to those previously reported (20–23). According to our previous report, thrombin  
291 production was increased at dabigatran and apixaban trough levels during vascular injury, but  
292 the response at DOAC peak levels was unknown (20). In this study, we found that the large  
293 thrombin production after vascular puncture during the peak phase of dabigatran was similar  
294 to the trough phase previously reported (20). Meanwhile, we found that an increased response  
295 to thrombin generation after vascular puncture was not observed during the peak phase of  
296 apixaban (20).

297 Unlike direct Xa inhibitors, direct thrombin inhibitors in the therapeutic range may  
298 be less effective in suppressing initial thrombin generation associated with vascular injury  
299 (24). Moreover, direct factor Xa inhibitors in the therapeutic range may suppress thrombin  
300 bursts after the initial thrombin generation (25). This finding may be the reason for the  
301 difference in thrombin-producing ability after vascular injury observed in this study.  
302 Compared with apixaban, dabigatran appeared to inhibit hemorrhagic complications such as  
303 intracranial hemorrhage and bleeding complications during catheter procedures (12–15,26).

304 In contrast, the risk of thrombotic events such as asymptomatic cerebral infarction during  
305 ablation may be greater in patients taking dabigatran (**15,23,27**). The difference in the  
306 thrombin generation response between both drugs observed in our study may be one of the  
307 reasons for the different clinical outcomes of thrombotic and hemorrhagic complications  
308 mentioned above.

309 Our results suggest that dabigatran increased the protein C and S levels, whereas  
310 apixaban increased antithrombin levels. DOACs may prolong clotting time, and protein C,  
311 protein S, and antithrombin activity may be overestimated (**28,29**). Meanwhile, antithrombin  
312 or protein C levels decreased after vascular puncture in both groups in this study. Although  
313 there is an interaction of DOACs on the measured values, before-and-after comparisons are  
314 possible. Therefore, decreased physiological anticoagulant factors during vascular puncture  
315 may indicate negative feedback for a hypercoagulable state in the DOAC recipients.

316 Our study had some limitations. The sample size was relatively small, and the study  
317 was underpowered to determine the difference in the increasing reaction of the SFMC. Blood  
318 samples obtained before vascular puncture might not accurately reflect the peak levels of  
319 DOACs because the elapsed time from the last administration of DOACs was approximately  
320 70–80 minutes (**30,31**). However, F1+2 levels 3 hours after the administration of DOACs at  
321 admission, when DOAC levels peaked, were equivalent to or higher than F1+2 levels before

322 vascular puncture. Therefore, the comparison of each measurement before and after vascular  
323 puncture in this study is considered an evaluation, while DOAC levels are fairly high.

324

### 325 **Conclusions**

326 In contrast to uninterrupted apixaban, uninterrupted dabigatran did not inhibit  
327 thrombin generation in response to vascular injury.

328

### 329 **Sources of Funding**

330 This study was supported by the Clinical Research Support Program from Niigata  
331 University Medical and Dental Hospital.

332

### 333 **Disclosures**

334 None

335

336

337 **References**

- 338 1. Thrall G, Lane D, Carroll D, Lip GY. Quality of life in patients with atrial fibrillation: a  
339 systematic review. *Am J Med.* 2006; 119:448.e1-e19.
- 340 2. Kimura K, Minematsu K, Yamaguchi T, Japan Multicenter Stroke Investigators'  
341 Collaboration (J-MUSIC). Atrial fibrillation as a predictive factor for severe stroke and early  
342 death in 15,831 patients with acute ischaemic stroke. *J Neurol Neurosurg Psychiatry.* 2005;  
343 76:679-683.
- 344 3. Mamas MA, Caldwell JC, Chacko S, Garratt CJ, Fath-Ordoubadi F, Neyses L. A  
345 meta-analysis of the prognostic significance of atrial fibrillation in chronic heart failure. *Eur J*  
346 *Heart Fail.* 2009; 11:676-683.
- 347 4. Cheng M, Lu X, Huang J, Zhang J, Zhang S, Gu D. The prognostic significance of atrial  
348 fibrillation in heart failure with a preserved and reduced left ventricular function: insights  
349 from a meta-analysis. *Eur J Heart Fail.* 2014;16:1317-1322.
- 350 5. Olsson LG, Swedberg K, Ducharme A, Granger CB, Michelson EL, McMurray JJ, Puu M,  
351 Yusuf S, Pfeffer MA; CHARM Investigators. Atrial fibrillation and risk of clinical events in  
352 chronic heart failure with and without left ventricular systolic dysfunction: results from the  
353 Candesartan in Heart failure-Assessment of Reduction in Mortality and morbidity (CHARM)  
354 program. *J Am Coll Cardiol.* 2006; 47:1997-2004.

- 355 6. Rivero-Ayerza M, Scholte op Reimer W, Lenzen M, Theuns DA, Jordaens L, Komajda M,  
356 Follath F, Swedberg K, Cleland JG. New-onset atrial fibrillation is an independent predictor  
357 of in-hospital mortality in hospitalized heart failure patients: results of the EuroHeart Failure  
358 Survey. *Eur Heart J*. 2008; 29:1618-1624.
- 359 7. Nogami A, Kurita T, Abe H, Ando K, Ishikawa T, Imai K, Usui A, Okishige K, Kusano K,  
360 Kumagai K, et al. JCS/JHRS 2019 Guideline on non-pharmacotherapy of cardiac arrhythmias.  
361 *Circ J*. 2021; 85:1104-1244.
- 362 8. Calkins H, Hindricks G, Cappato R, Kim YH, Saad EB, Aguinaga L, Akar JG, Badhwar V,  
363 Brugada J, Camm J, et al. 2017 HRS/EHRA/ECAS/APHRS/SOLAECE expert consensus  
364 statement on catheter and surgical ablation of atrial fibrillation. *Europace*. 2018; 20:e1-e160.
- 365 9. Ono K, Iwasaki YK, Akao M, Ikeda T, Ishii K, Inden Y, Kusano K, Kobayashi Y,  
366 Koretsune Y, Sasano T, et al. JCS/JHRS 2020 Guideline on pharmacotherapy of cardiac  
367 arrhythmias. *Circ J*. 2022; 86:1790-1924.
- 368 10. Kirchhof P, Benussi S, Kotecha D, Ahlsson A, Atar D, Casadei B, et al. 2016 ESC  
369 Guidelines for the management of atrial fibrillation developed in collaboration with EACTS.  
370 *Eur Heart J*. 2016; 37:2893-2962.
- 371 11. Steffel J, Verhamme P, Potpara TS, Albaladejo P, Antz M, Desteghe L, Haeusler KG,  
372 Oldgren J, Reinecke H, Roldan-Schilling V, et al. The 2018 European Heart Rhythm

- 373 Association Practical Guide on the use of non-vitamin K antagonist oral anticoagulants in  
374 patients with atrial fibrillation. *Eur Heart J.* 2018; 39:1330-1393.
- 375 12. Cappato R, Marchlinski FE, Hohnloser SH, Naccarelli GV, Xiang J, Wilber DJ, Ma CS,  
376 Hess S, Wells DS, Juang G, et al. Uninterrupted rivaroxaban vs. uninterrupted vitamin K  
377 antagonists for catheter ablation in non-valvular atrial fibrillation. *Eur Heart J.*  
378 2015;36:1805-1811.
- 379 13. Calkins H, Willems S, Gerstenfeld EP, Verma A, Schilling R, Hohnloser SH, Okumura K,  
380 Serota H, Nordaby M, Guiver K, et al. Uninterrupted dabigatran versus warfarin for ablation  
381 in atrial fibrillation. *N Engl J Med.* 2017; 376:1627-1636.
- 382 14. Kirchhof P, Haessler KG, Blank B, De Bono J, Callans D, Elvan A, Fetsch T, Van Gelder  
383 IC, Gentlesk P, Grimaldi M, et al. Apixaban in patients at risk of stroke undergoing atrial  
384 fibrillation ablation. *Eur Heart J.* 2018; 39:2942-2955.
- 385 15. Hohnloser SH, Camm J, Cappato R, Diener HC, Heidbüchel H, Mont L, Morillo CA,  
386 Abozguia K, Grimaldi M, Rauer H, et al. Uninterrupted edoxaban vs. vitamin K antagonists  
387 for ablation of atrial fibrillation: the ELIMINATE-AF trial. *Eur Heart J.* 2019;40:3013-3021.
- 388 16. Gage BF, Waterman AD, Shannon W, Boehler M, Rich MW, Radford MJ. Validation of  
389 clinical classification schemes for predicting stroke: results from the National Registry of  
390 Atrial Fibrillation. *JAMA.* 2001; 285:2864-2870.

- 391 17. De Caterina R, Husted S, Wallentin L, De Caterina R, Husted S, Wallentin L, Andreotti F,  
392 Arnesen H, Bachmann F, Baigent C. New oral anticoagulants in atrial fibrillation and acute  
393 coronary syndromes: ESC Working Group on Thrombosis—Task Force on Anticoagulants in  
394 Heart Disease position paper. *J Am Coll Cardiol*. 2012; 59:1413-1425.
- 395 18. Prabhu MV, Juneja D, Gopal PB, Sathyanarayanan M, Subhramanyam S, Gandhe S..  
396 Ultrasound-guided femoral dialysis access placement: a single-center randomized trial. *Clin J*  
397 *Am Soc Nephrol*. 2010; 5:235-239.
- 398 19. Troianos CA, Hartman GS, Glas KE, Skubas NJ, Eberhardt RT, Walker JD, Reeves ST.  
399 Guidelines for performing ultrasound guided vascular cannulation: recommendations of the  
400 American Society of Echocardiography and the Society of Cardiovascular Anesthesiologists.  
401 *J Am Soc Echocardiogr*. 2011; 24:1291-1318.
- 402 20. Otuki S, Izumi D, Suda M, Sato A, Hasegawa Y, Yagihara N, Iijima K, Chinushi M, Fuse  
403 I, Minamino T. Effects of direct oral anticoagulants at the peak phase, trough phase, and after  
404 vascular injury. *J Am Coll Cardiol*. 2018; 71:102-104.
- 405 21. Nakano Y, Kondo T, Osanai H, Murase Y, Nakashima Y, Asano H, Ajioka M, Sakai K,  
406 Inden Y, Murohara T. Clinical usefulness of measuring prothrombin time and soluble fibrin  
407 levels in Japanese patients with atrial fibrillation receiving rivaroxaban. *J Cardiol*. 2015;  
408 65:185-190.

- 409 22. Tajiri K, Sato A, Harunari T, Shimojo N, Yamaguchi I, Aonuma K. Impact of rivaroxaban  
410 compared with warfarin on the coagulation status in Japanese patients with non-valvular  
411 atrial fibrillation: a preliminary analysis of the prothrombin fragment 1+2 levels. *J Cardiol.*  
412 2015; 65:191-196.
- 413 23. Nagao T, Higo S, Suzuki H, Teshima Y, Matsunaga S, Harada K, Shinoda N, Harada K,  
414 Kato M, Marui N, et al. Prospective comparison of periprocedural coagulation markers  
415 among uninterrupted anticoagulants for atrial fibrillation ablation. *Heart Rhythm.* 2020;  
416 17:391-397.
- 417 24. Samama MM, Le Flem L, Guinet C, Gerotziafas G, Depasse F. Three different patterns of  
418 calibrated automated thrombogram obtained with six different anticoagulants. *J Thromb*  
419 *Haemost.* 2007; 5:2554-2556.
- 420 25. Shibeko AM, Lobanova ES, Panteleev MA, Ataullakhanov FI. Blood flow controls  
421 coagulation onset via the positive feedback of factor VII activation by factor Xa. *BMC Syst*  
422 *Biol.* 2010; 4:5.
- 423 26. Connolly SJ, Ezekowitz MD, Yusuf S, Eikelboom J, Oldgren J, Parekh A, Pogue J, Reilly  
424 PA, Themeles E, Varrone J, et al. Dabigatran versus warfarin in patients with atrial fibrillation.  
425 *N Engl J Med.* 2009;361:1139-1151.
- 426 27. Nakamura K, Naito S, Sasaki T, Minami K, Take Y, Goto E, Shimizu S, Yamaguchi Y,  
427 Suzuki N, Yano T, et al. Silent cerebral ischemic lesions after catheter ablation of atrial



- 428 fibrillation in patients on 5 types of periprocedural oral anticoagulation-predictors of  
429 diffusion-weighted imaging-positive lesions and follow-up magnetic resonance imaging. *Circ*  
430 *J.* 2016; 80:870-877.
- 431 28. Mani H. Interpretation of coagulation test results under direct oral anticoagulants. *Int J*  
432 *Lab Hematol.* 2014; 36:261-268.
- 433 29. Moser KA, Smock KJ. Direct oral anticoagulant (DOAC) interference in hemostasis  
434 assays. *Hematology Am Soc Hematol Educ Program.* 2021; 2021:129-133.
- 435 30. Stangier J. Clinical pharmacokinetics and pharmacodynamics of the oral direct thrombin  
436 inhibitor dabigatran etexilate. *Clin Pharmacokinet.* 2008; 47:285-295.
- 437 31. Frost C, Nepal S, Wang J, Schuster A, Byon W, Boyd RA, Yu Z, Shenker A, Barrett YC,  
438 Mosqueda - Garcia R. Safety, pharmacokinetics and pharmacodynamics of multiple oral  
439 doses of apixaban, a factor Xa inhibitor, in healthy subjects. *Br J Clin Pharmacol.*  
440 2013;76:776-786.

Table.1

Baseline characteristics

|                                                                | <b>Dabigatran group (n=20)</b> | <b>Apixaban group (n=21)</b> | <b>P value</b> |
|----------------------------------------------------------------|--------------------------------|------------------------------|----------------|
| <b>Female, n (%)</b>                                           | 4 (20)                         | 4 (19)                       | 1              |
| <b>Age, years</b>                                              | 61.3 ± 8.5                     | 63.8 ± 7.8                   | 0.34           |
| <b>Type of atrial fibrillation, n (%)</b>                      |                                |                              | 0.44           |
| <b>Paroxysmal</b>                                              | 11 (55)                        | 14 (67)                      |                |
| <b>Persistent</b>                                              | 9 (45)                         | 7 (33)                       |                |
| <b>Chronic heart failure, n (%)</b>                            | 0                              | 0                            | 1              |
| <b>Hypertension, n (%)</b>                                     | 11 (55)                        | 14 (67)                      | 0.44           |
| <b>Diabetes, n (%)</b>                                         | 2 (10)                         | 3 (14)                       | 1              |
| <b>History of stroke or transit<br/>ischemic attack, n (%)</b> | 2 (10)                         | 1 (5)                        | 0.61           |
| <b>CHADS2 score</b>                                            | 0.85 ± 0.81                    | 0.95 ± 0.67                  | 0.66           |
| <b>Low-dose anticoagulants, n (%)</b>                          | 2 (10)                         | 0                            | 0.23           |
| <b>Body weight, kg</b>                                         | 72.0 ± 13.4                    | 73.4 ± 13.1                  | 0.74           |
| <b>Systolic blood pressure, mmHg</b>                           | 126 ± 16                       | 123 ± 14                     | 0.57           |
| <b>Diastolic blood pressure, mmHg</b>                          | 80 ± 12                        | 77 ± 11                      | 0.50           |
| <b>Heart rate, bpm</b>                                         | 76 ± 12                        | 71 ± 11                      | 0.18           |
| <b>Body temperature, °C</b>                                    | 36.2 ± 0.4                     | 36.3 ± 0.6                   | 0.53           |

|                                               |             |             |      |
|-----------------------------------------------|-------------|-------------|------|
| <b>Left ventricular ejection fraction, %</b>  | 63.7 ± 6.7  | 63.2 ± 6.7  | 0.80 |
| <b>Aspartate aminotransferase, U/L</b>        | 24 ± 7      | 28 ± 9      | 0.14 |
| <b>Alanine aminotransferase, U/L</b>          | 25 ± 9      | 31 ± 13     | 0.10 |
| <b>Lactate dehydrogenase, U/L</b>             | 191 ± 23    | 194 ± 25    | 0.72 |
| <b>Creatinine, mg/dL</b>                      | 0.83 ± 0.13 | 0.83 ± 0.15 | 0.90 |
| <b>Estimated creatinine clearance, mL/min</b> | 94.1 ± 22.2 | 92.7 ± 22.1 | 0.85 |
| <b>Hemoglobin A1c, %</b>                      | 5.8 ± 0.4   | 5.8 ± 0.5   | 0.83 |
| <b>Hemoglobin, g/dL</b>                       | 14.7 ± 1.4  | 14.8 ± 1.2  | 0.81 |

Table.2

Vascular puncture situation

|                                                                               | <b>Dabigatran group (n=20)</b> | <b>Apixaban group (n=21)</b> | <b>P value</b> |
|-------------------------------------------------------------------------------|--------------------------------|------------------------------|----------------|
| <b>Number of internal jugular venous sheaths</b>                              | 1                              | 1                            | 1              |
| <b>Number of femoral venous sheaths</b>                                       | 2.2 ± 0.4                      | 2.1 ± 0.3                    | 0.35           |
| <b>Number of femoral arterial sheaths</b>                                     | 1                              | 1                            | 1              |
| <b>Time from last dose to pre-puncture blood collection, min</b>              | 71 ± 29                        | 79 ± 22                      | 0.37           |
| <b>Time from last dose to post-puncture blood collection, min</b>             | 149 ± 14                       | 153 ± 19                     | 0.46           |
| <b>Time from beginning of puncture to post-puncture blood collection, min</b> | 10.4 ± 0.7                     | 10.5 ± 1.2                   | 0.80           |

| The day before procedure |         |         | The day of ablation |                       |
|--------------------------|---------|---------|---------------------|-----------------------|
| Dabigatran               | AM<br>● | PM<br>● | ●                   | AM<br><b>Ablation</b> |
| Apixaban                 | ●       | ●       | ●                   | <b>Ablation</b>       |
| Sampling                 |         |         |                     |                       |

**Figure 1.** Study protocol. Venous blood was collected thrice to investigate the effect of vascular injury on the coagulation system in uninterrupted DOAC recipients: 180 minutes after the anticoagulant was administered on the day before the procedure, before the vascular punctures of the ablation procedure, and 10–15 minutes after the initiation of the vascular punctures.

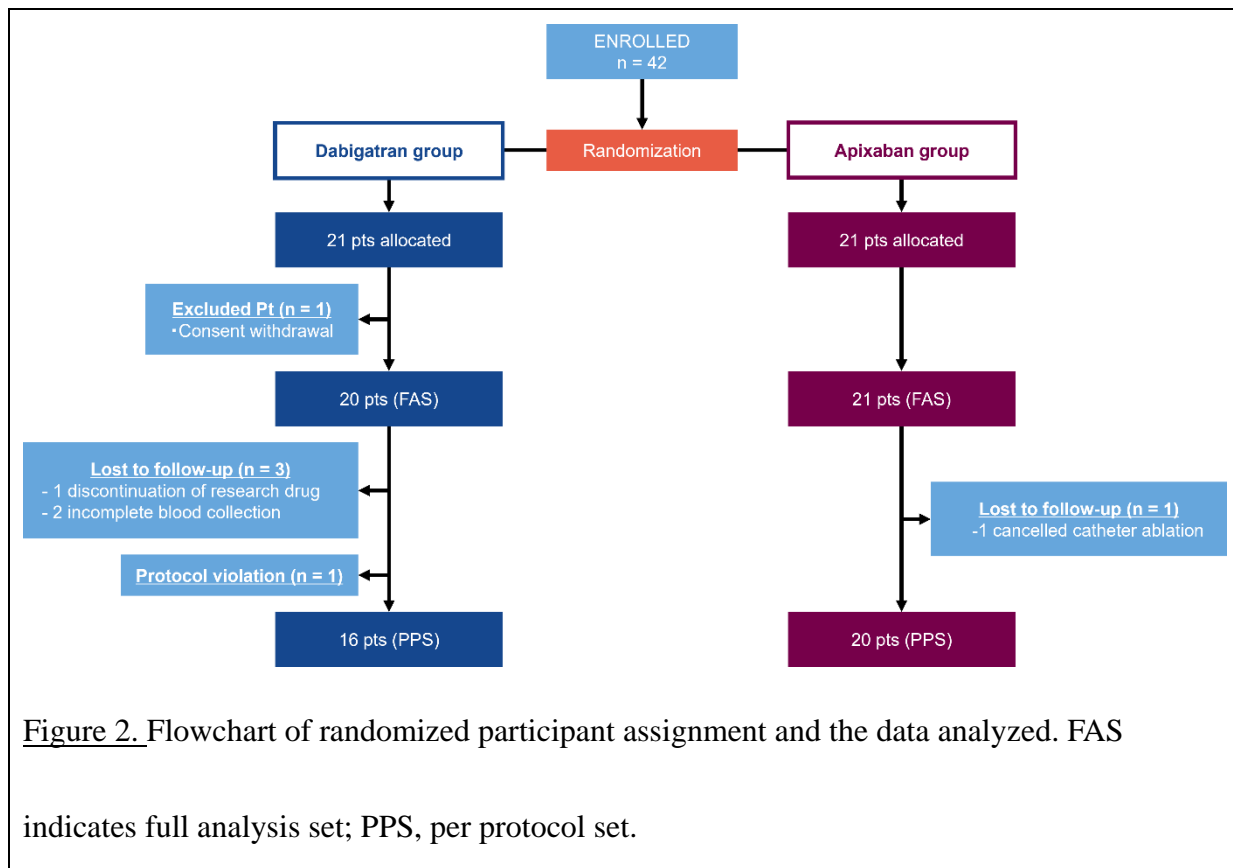

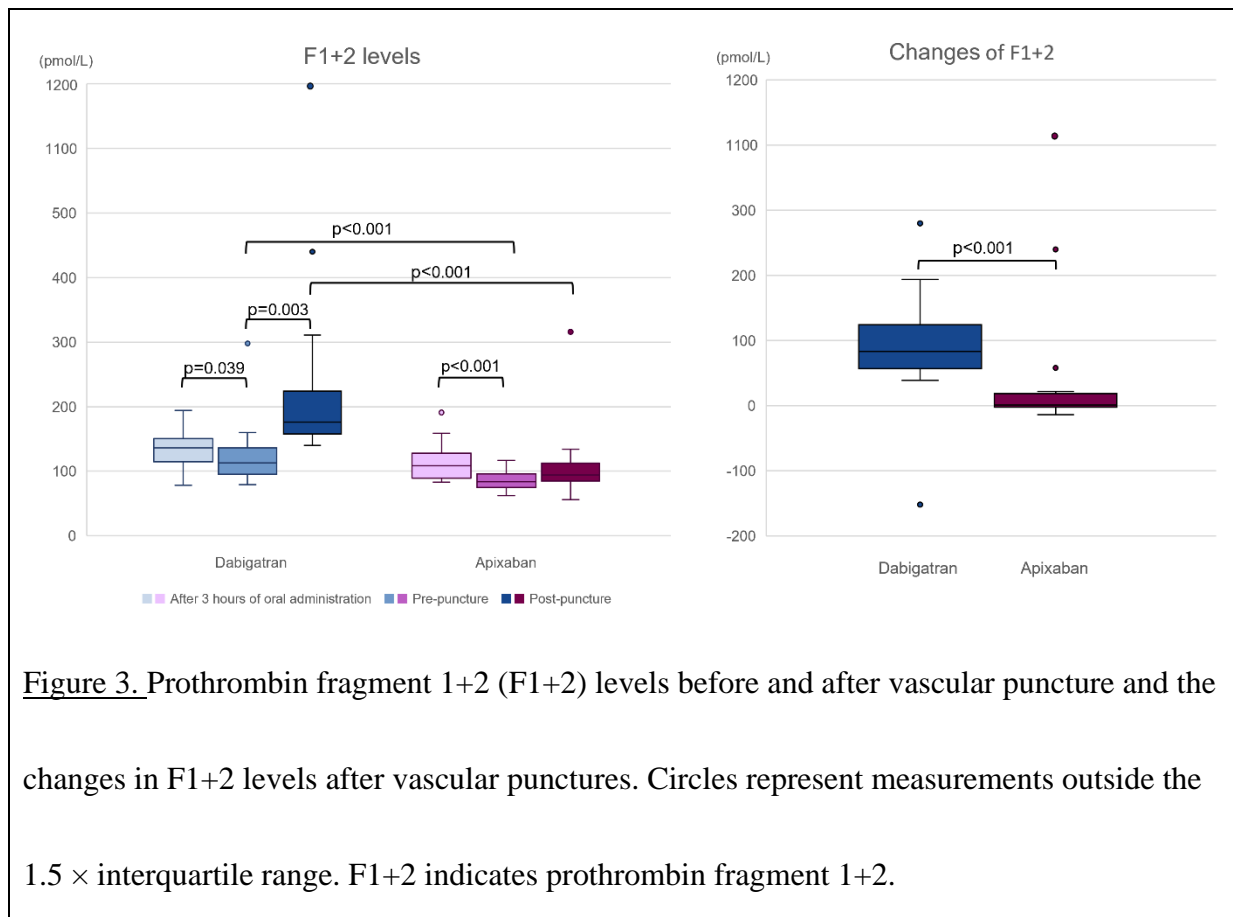

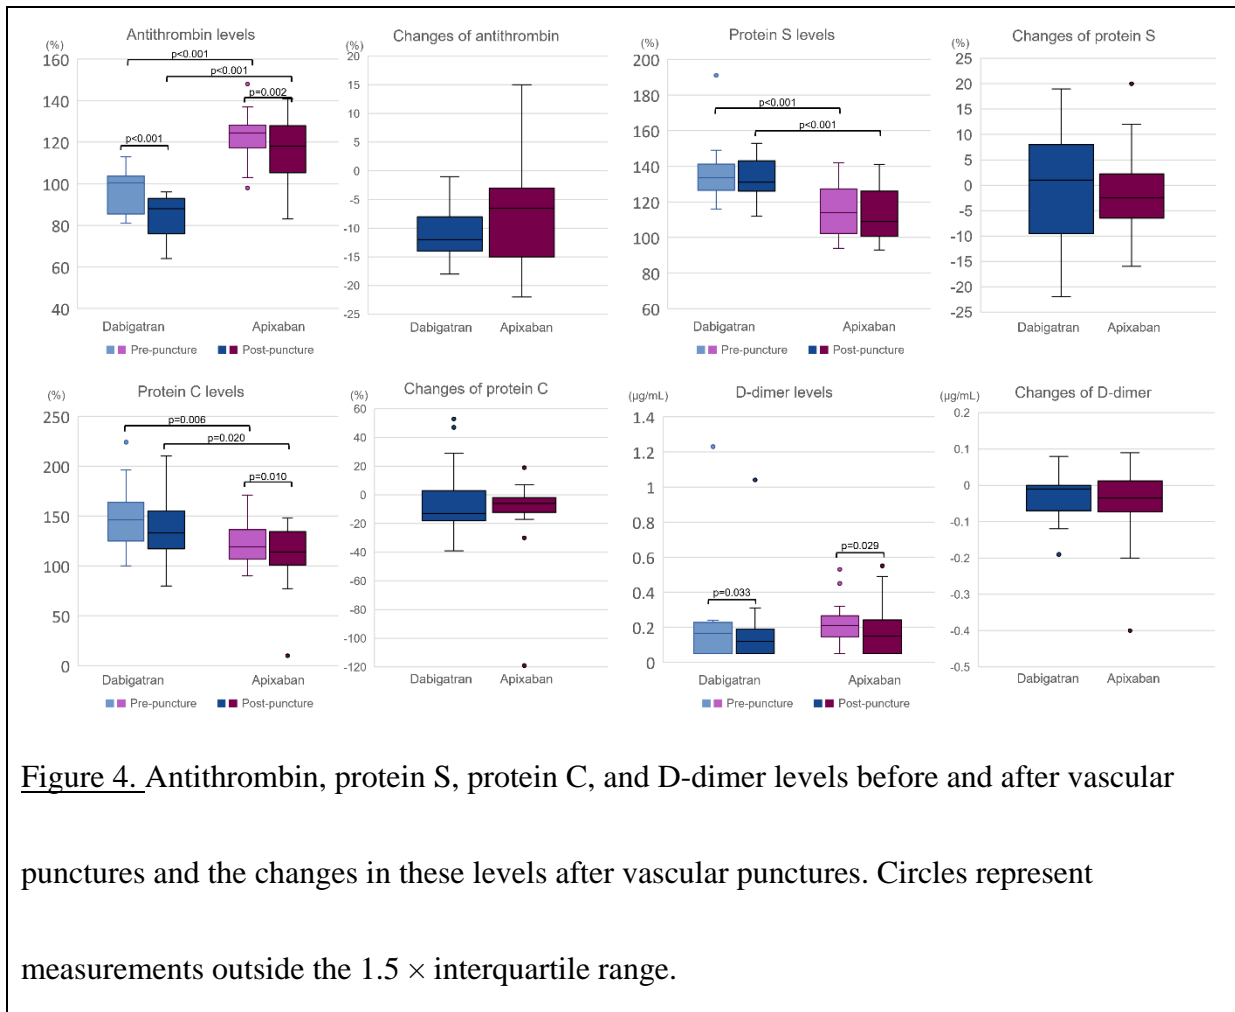

**Figure 4.** Antithrombin, protein S, protein C, and D-dimer levels before and after vascular punctures and the changes in these levels after vascular punctures. Circles represent measurements outside the 1.5 × interquartile range.
